# Supplementary material for: Analysis of Isotopic Labeling in Peptide Fragments by Tandem Mass Spectrometry
Source: PLoS One. 2014 Mar 13;9(3):e91537. doi: 10.1371/journal.pone.0091537 (PMC3953442; doi:10.1371/journal.pone.0091537)
Supplement: File S4 — FTMS and ITMS Comparison. (DOCX) [file pone.0091537.s004.docx]

**Analysis of isotopic labeling in peptide fragments by tandem mass spectrometry**

**Doug K. Allen*, Bradley S. Evans and Igor G. L. Libourel**

**File S4: FTMS and ITMS Comparison**


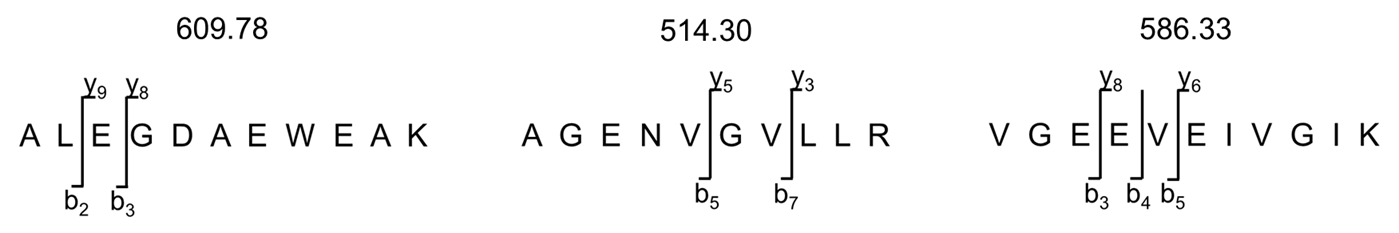


FTMS data summarized as average labeling for three peptides fragmented at multiple CID energies measured in MS2. Statistics represent two samples each with evaluation at three scans nearest the apex of the eluted peptide peak.

| **Parent Mass & Products** | **0** | **15** | **20** | **25** | **35** |
| --- | --- | --- | --- | --- | --- |
| **609.78** | 7.14±0.03 | 8.33±0.13 | 11.43±0.82 | --- | --- |
| **y8** | --- | 3.68±0.29 | 5.60±0.19 | --- | 6.77±0.09 |
| **b3** |  | 3.72±0.99 | 5.66±0.67 | --- | 6.12±0.25 |
|  |  |  |  |  |  |
| **514.3** | 7.07±0.03 | 8.54±0.19 | 11.88±0.14 | 14.53±0.08 | --- |
| **y5** | --- | 3.40±0.16 | 5.22±0.09 | 6.21±0.06 | 6.95±0.07 |
| **b5** | --- | 3.74±0.34 | 5.44±0.19 | 6.13±0.14 | 6.45±0.06 |
| **y3** | --- | 3.76±0.33 | 5.35±0.16 | 6.11±0.11 | 6.60±0.11 |
| **b7** | --- | 4.44±0.48 | 5.81±0.15 | 6.19±0.25 | 6.12±0.17 |
|  |  |  |  |  |  |
| **586.33** | 7.09±0.01 | 8.01±0.17 | 10.24±1.54 | 13.31±0.04 | --- |
| **y6** | --- | 2.89±0.20 | 5.08±0.09 | 6.07±0.12 | 6.57±0.32 |
| **b5** | --- | 3.03±0.28 | 5.36±0.20 | 6.00±0.37 | 5.94±0.06 |
| **y8** | --- | 2.78±0.19 | 5.04±0.13 | 6.10±0.10 | 6.69±0.10 |
| **b3** | --- | 2.16±1.12 | 4.89±0.49 | 5.57±0.58 | 6.31±0.36 |

ITMS data summarized as average labeling for three peptides fragmented at multiple CID energies measured in MS2. Statistics represent two samples each with evaluation at three scans nearest the apex of the eluted peptide peak.

| **Parent Mass & Products** | **0** | **15** | **20** | **25** | **35** |
| --- | --- | --- | --- | --- | --- |
| **609.78** | 7.14±0.03 | 8.33±0.13 | 11.43±0.82 | --- | --- |
| **y8** | --- | 4.20±0.26 | 6.97±0.24 | --- | 7.19±0.19 |
| **b3** | --- | 4.81±0.74 | 7.80±0.91 | --- | 6.96±1.65 |
|  |  |  |  |  |  |
| **514.3** | 7.07±0.03 | 8.54±0.19 | 11.88±0.14 | 14.53±0.08 | --- |
| **y5** | --- | 4.20±0.24 | 6.89±0.15 | 7.15±0.06 | 7.16±0.06 |
| **b5** | --- | 4.35±0.38 | 7.29±0.21 | 7.44±0.26 | 7.53±0.34 |
| **y3** | --- | 4.68±0.45 | 7.07±0.22 | 6.97±0.25 | 7.27±0.29 |
| **b7** | --- | 4.79±0.41 | 7.22±0.20 | 7.58±0.38 | 7.23±0.67 |
|  |  |  |  |  |  |
| **586.33** | 7.09±0.01 | 8.01±0.17 | 10.24±1.54 | 13.31±0.04 | --- |
| **y6** | --- | 4.28±0.40 | 6.73±0.30 | 7.34±0.18 | 7.13±0.29 |
| **b5** | --- | 3.84±0.59 | 7.50±0.49 | 7.10±0.60 | 7.16±0.95 |
| **y8** | --- | 3.95±0.37 | 6.38±0.27 | 7.09±0.30 | 7.35±0.22 |
| **b3** | --- | 2.90±1.49 | 7.22±0.99 | 7.12±0.76 | 8.03±1.04 |
